# Supplementary material for: Stat3 Mediates Expression of Autotaxin in Breast Cancer
Source: PubMed Central journal article supplement (PMC3225372; doi:10.1371/journal.pone.0027851), 2011-11-28
Supplement: pone.0027851.s002.pdf [file pone.0027851.s002.pdf]

### Supplemental Table1

| Probeset ID | Gene Symbol | p-value | Fold-Change | Probeset ID | Gene Symbol | p-value | Fold-Change |
|-------------|-------------|---------|-------------|-------------|-------------|---------|-------------|
| 209392_at   | ENPP2       | 4.2E-07 | 8.70        | 202973_x_at | FAM13A      | 2.4E-04 | 2.51        |
| 210839_s_at | ENPP2       | 2.0E-07 | 8.15        | 212298_at   | NRP1        | 4.5E-05 | 2.51        |
| 206488_s_at | CD36        | 2.3E-03 | 4.01        | 203131_at   | PDGFRA      | 6.1E-03 | 2.50        |
| 218002_s_at | CXCL14      | 8.5E-03 | 3.73        | 202007_at   | NID1        | 1.1E-03 | 2.50        |
| 204438_at   | MRC1 /      | 6.4E-03 | 3.54        | 201360_at   | CST3        | 2.3E-04 | 2.49        |
| 213139_at   | SNAI2       | 8.7E-03 | 3.39        | 208892_s_at | DUSP6       | 2.1E-02 | 2.47        |
| 206042_x_at | SNRPN /     | 5.8E-05 | 3.31        | 204174_at   | ALOX5AP     | 1.7E-02 | 2.47        |
| 202409_at   | IGF2        | 3.5E-02 | 3.26        | 211896_s_at | DCN         | 2.9E-02 | 2.44        |
| 212192_at   | KCTD12      | 6.6E-04 | 3.14        | 213943_at   | TWIST1      | 1.6E-03 | 2.44        |
| 204298_s_at | LOX         | 5.2E-03 | 3.00        | 209348_s_at | MAF         | 1.1E-06 | 2.43        |
| 202709_at   | FMOD        | 1.8E-04 | 2.99        | 204052_s_at | SFRP4       | 3.4E-02 | 2.43        |
| 212097_at   | CAV1        | 3.4E-05 | 2.97        | 201278_at   | DAB2        | 5.5E-04 | 2.43        |
| 201116_s_at | CPE         | 2.4E-04 | 2.97        | 205542_at   | STEAP1      | 1.8E-02 | 2.40        |
| 209555_s_at | CD36        | 1.6E-02 | 2.97        | 214500_at   | H2AFY       | 2.3E-04 | 2.40        |
| 209541_at   | IGF1        | 7.3E-03 | 2.91        | 209656_s_at | TMEM47      | 4.8E-02 | 2.39        |
| 213566_at   | RNASE6      | 3.0E-04 | 2.90        | 211571_s_at | VCAN        | 1.1E-02 | 2.38        |
| 219607_s_at | MS4A4A      | 1.7E-02 | 2.90        | 204472_at   | GEM         | 3.4E-03 | 2.37        |
| 215446_s_at | LOX         | 2.6E-03 | 2.88        | 201743_at   | CD14        | 2.6E-02 | 2.36        |
| 219935_at   | ADAMTS      | 4.3E-03 | 2.88        | 211734_s_at | FCER1A      | 1.1E-02 | 2.36        |
| 201522_x_at | SNRPN /     | 3.2E-04 | 2.87        | 212865_s_at | COL14A1     | 2.5E-02 | 2.36        |
| 204955_at   | SRPX        | 5.5E-03 | 2.85        | 205624_at   | CPA3        | 6.4E-03 | 2.35        |
| 218625_at   | NRN1        | 1.3E-02 | 2.84        | 207977_s_at | DPT         | 4.5E-02 | 2.35        |
| 209612_s_at | ADH1B       | 3.0E-02 | 2.83        | 219049_at   | CSGALNA     | 1.5E-03 | 2.35        |
| 206584_at   | LY96        | 3.3E-03 | 2.82        | 202207_at   | ARL4C       | 1.9E-03 | 2.33        |
| 201645_at   | TNC         | 1.8E-02 | 2.81        | 203561_at   | FCGR2A      | 2.2E-02 | 2.32        |
| 203065_s_at | CAV1        | 1.8E-04 | 2.81        | 201280_s_at | DAB2        | 3.4E-03 | 2.31        |
| 205943_at   | TDO2        | 1.7E-02 | 2.78        | 201008_s_at | TXNIP       | 8.6E-03 | 2.31        |
| 204774_at   | EVI2A       | 2.1E-04 | 2.76        | 202206_at   | ARL4C       | 4.7E-03 | 2.31        |
| 203305_at   | F13A1       | 1.4E-02 | 2.74        | 218656_s_at | LHFP        | 8.5E-04 | 2.30        |
| 213125_at   | OLFML2      | 4.6E-03 | 2.67        | 213524_s_at | G0S2        | 2.4E-02 | 2.28        |
| 208944_at   | TGFBR2      | 1.3E-04 | 2.66        | 201540_at   | FHL1        | 6.0E-03 | 2.27        |
| 203548_s_at | LPL         | 1.6E-02 | 2.64        | 219014_at   | PLAC8       | 1.3E-02 | 2.27        |
| 201117_s_at | CPE         | 4.4E-04 | 2.61        | 201505_at   | LAMB1       | 2.3E-02 | 2.27        |
| 221796_at   | NTRK2       | 4.6E-02 | 2.61        | 204959_at   | MNDA        | 2.8E-02 | 2.27        |
| 208131_s_at | PTGIS       | 4.1E-03 | 2.61        | 204646_at   | DPYD        | 1.5E-03 | 2.26        |
| 202016_at   | MEST        | 9.7E-03 | 2.59        | 211506_s_at | IL8         | 1.6E-02 | 2.26        |
| 201279_s_at | DAB2        | 2.0E-04 | 2.57        | 205991_s_at | PRRX1       | 5.4E-03 | 2.26        |
| 213258_at   | TFPI        | 1.2E-04 | 2.57        | 202741_at   | PRKACB      | 3.4E-04 | 2.25        |
| 203504_s_at | ABCA1       | 3.4E-05 | 2.54        | 209200_at   | MEF2C       | 5.4E-04 | 2.25        |
| 202746_at   | ITM2A       | 1.3E-02 | 2.54        | 209047_at   | AQP1 ///    | 9.7E-04 | 2.24        |
| 201667_at   | GJA1        | 1.5E-02 | 2.53        | 204122_at   | TYROBP      | 1.8E-02 | 2.24        |
| 215646_s_at | VCAN        | 8.3E-03 | 2.53        | 204688_at   | SGCE        | 2.7E-03 | 2.24        |
| 209613_s_at | ADH1B       | 3.2E-02 | 2.53        | 202113_s_at | SNX2        | 3.9E-03 | 2.24        |
| 207808_s_at | PROS1       | 1.5E-03 | 2.53        | 205226_at   | PDGFRL      | 4.2E-03 | 2.24        |
| 218718_at   | PDGFC       | 8.1E-04 | 2.53        | 210764_s_at | CYR61       | 3.0E-03 | 2.22        |
| 215388_s_at | CFH /       | 3.0E-04 | 2.53        | 204563_at   | SELL        | 1.7E-02 | 2.21        |
| 212588_at   | PTPRC       | 1.0E-02 | 2.52        | 202878_s_at | CD93        | 1.8E-03 | 2.20        |
| 211742_s_at | EVI2B       | 1.3E-03 | 2.52        | 202202_s_at | LAMA4       | 6.0E-03 | 2.20        |

| Probeset ID | Gene Symbol | p-value | Fold-Change | Probeset ID | Gene Symbol | p-value | Fold-Change |
|-------------|-------------|---------|-------------|-------------|-------------|---------|-------------|
| 206332_s_at | IFI16       | 1.2E-02 | 2.20        | 219947_at   | CLEC4A      | 2.9E-02 | 2.03        |
| 210757_x_at | DAB2        | 7.9E-04 | 2.20        | 212587_s_at | PTPRC       | 5.2E-03 | 2.02        |
| 221210_s_at | NPL         | 1.5E-02 | 2.19        | 203562_at   | FEZ1        | 1.3E-04 | 2.02        |
| 210946_at   | PPAP2A      | 4.9E-03 | 2.18        | 201581_at   | TMX4        | 1.0E-03 | 2.02        |
| 218589_at   | LPAR6       | 1.0E-03 | 2.18        | 205683_x_at | TPSAB1      | 4.9E-02 | 2.01        |
| 203104_at   | CSF1R       | 9.1E-04 | 2.18        | 207134_x_at | TPSB2       | 3.2E-02 | 2.00        |
| 209540_at   | IGF1        | 6.8E-03 | 2.17        | 214290_s_at | HIST2H2A    | 2.9E-02 | -2.00       |
| 208891_at   | DUSP6       | 3.7E-02 | 2.17        | 213050_at   | COBL        | 2.2E-02 | -2.01       |
| 217047_s_at | FAM13A      | 9.4E-05 | 2.17        | 202870_s_at | CDC20       | 3.9E-03 | -2.02       |
| 211813_x_at | DCN         | 4.1E-02 | 2.16        | 209529_at   | PPAP2C      | 3.8E-02 | -2.02       |
| 222108_at   | AMIGO2      | 1.6E-02 | 2.16        | 201292_at   | TOP2A       | 5.9E-03 | -2.03       |
| 209147_s_at | PPAP2A      | 4.8E-03 | 2.15        | 204822_at   | TTK         | 7.0E-03 | -2.04       |
| 219759_at   | ERAP2       | 2.4E-02 | 2.15        | 209260_at   | SFN         | 2.1E-03 | -2.04       |
| 207238_s_at | PTPRC       | 3.9E-03 | 2.14        | 204654_s_at | TFAP2A      | 1.8E-02 | -2.04       |
| 208983_s_at | PECAM1      | 4.9E-03 | 2.14        | 210559_s_at | CDC2        | 8.0E-04 | -2.05       |
| 221558_s_at | LEF1        | 3.0E-03 | 2.14        | 204026_s_at | ZWINT       | 7.0E-06 | -2.07       |
| 200920_s_at | BTG1        | 4.0E-03 | 2.12        | 204679_at   | KCNK1       | 1.6E-02 | -2.07       |
| 210889_s_at | FCGR2B      | 2.5E-02 | 2.12        | 202575_at   | CRABP2      | 2.6E-02 | -2.08       |
| 201720_s_at | LAPTM5      | 1.2E-02 | 2.12        | 203213_at   | CDC2        | 9.1E-07 | -2.10       |
| 203887_s_at | THBD        | 8.3E-03 | 2.11        | 208779_x_at | DDR1        | 2.0E-02 | -2.11       |
| 202948_at   | IL1R1       | 3.2E-02 | 2.11        | 202708_s_at | HIST2H2B    | 3.6E-02 | -2.11       |
| 213416_at   | ITGA4       | 2.5E-05 | 2.10        | 202954_at   | UBE2C       | 4.9E-04 | -2.12       |
| 205898_at   | CX3CR1      | 3.6E-04 | 2.10        | 218039_at   | NUSAP1      | 4.5E-04 | -2.13       |
| 217889_s_at | CYBRD1      | 3.9E-03 | 2.09        | 202705_at   | CCNB2       | 5.4E-06 | -2.13       |
| 208893_s_at | DUSP6       | 1.3E-02 | 2.09        | 204170_s_at | CKS2        | 1.1E-02 | -2.13       |
| 209581_at   | PLA2G1      | 3.8E-02 | 2.09        | 219121_s_at | ESRP1       | 5.1E-03 | -2.15       |
| 201109_s_at | THBS1       | 1.2E-02 | 2.09        | 208079_s_at | AURKA       | 4.8E-05 | -2.17       |
| 204150_at   | STAB1       | 5.1E-03 | 2.09        | 209008_x_at | KRT8        | 4.0E-02 | -2.19       |
| 211671_s_at | NR3C1       | 7.2E-04 | 2.09        | 219959_at   | MOCOS       | 1.1E-02 | -2.21       |
| 200762_at   | DPYSL2      | 6.0E-03 | 2.08        | 203876_s_at | MMP11       | 1.2E-03 | -2.22       |
| 208966_x_at | IFI16       | 2.5E-02 | 2.08        | 203744_at   | HMGB3       | 5.4E-04 | -2.22       |
| 208965_s_at | IFI16       | 9.4E-03 | 2.08        | 218542_at   | CEP55       | 2.6E-06 | -2.22       |
| 204115_at   | GNG11       | 6.3E-03 | 2.08        | 205807_s_at | TUFT1       | 7.7E-03 | -2.22       |
| 209199_s_at | MEF2C       | 3.1E-04 | 2.07        | 214240_at   | GAL         | 2.2E-02 | -2.26       |
| 207173_x_at | CDH11       | 1.8E-02 | 2.07        | 202580_x_at | FOXM1       | 1.6E-03 | -2.27       |
| 219872_at   | C4orf18     | 2.0E-03 | 2.06        | 218186_at   | RAB25       | 3.7E-02 | -2.28       |
| 211651_s_at | LAMB1       | 1.3E-02 | 2.06        | 205428_s_at | CALB2       | 1.6E-02 | -2.31       |
| 220330_s_at | SAMSN1      | 5.8E-03 | 2.06        | 212070_at   | GPR56       | 1.5E-02 | -2.32       |
| 201865_x_at | NR3C1       | 3.6E-04 | 2.06        | 202525_at   | PRSS8       | 1.5E-02 | -2.32       |
| 204638_at   | ACP5        | 3.6E-02 | 2.06        | 214469_at   | HIST1H2A    | 9.8E-03 | -2.34       |
| 209732_at   | CLEC2B      | 1.9E-03 | 2.06        | 221854_at   | PKP1        | 2.4E-02 | -2.35       |
| 212764_at   | ZEB1        | 1.6E-03 | 2.05        | 204127_at   | RFC3        | 2.3E-03 | -2.38       |
| 211676_s_at | IFNGR1      | 8.6E-04 | 2.05        | 37117_at    | ARHGAP8     | 1.1E-02 | -2.38       |
| 204834_at   | FGL2        | 1.9E-02 | 2.05        | 204641_at   | NEK2        | 8.7E-05 | -2.39       |
| 204220_at   | GMFG        | 3.0E-03 | 2.04        | 207828_s_at | CENPF       | 3.8E-04 | -2.42       |
| 203799_at   | CD302       | 7.1E-03 | 2.04        | 213906_at   | MYBL1       | 4.1E-02 | -2.42       |
| 204057_at   | IRF8        | 1.0E-02 | 2.04        | 203407_at   | PPL         | 7.3E-03 | -2.45       |
| 219666_at   | MS4A6A      | 3.1E-02 | 2.03        | 203407_at   | PPL         | 7.3E-03 | -2.45       |

| <b>Probeset ID</b> | <b>Gene Symbol</b> | <b>p-value</b> | <b>Fold-Change</b> |
|--------------------|--------------------|----------------|--------------------|
| 208190_s_at        | LSR                | 3.1E-02        | -2.47              |
| 203878_s_at        | MMP11              | 2.4E-03        | -2.56              |
| 212531_at          | LCN2               | 3.3E-02        | -2.72              |
| 33322_i_at         | SFN                | 1.6E-03        | -2.74              |
| 203108_at          | GPRC5A             | 1.3E-02        | -2.75              |
| 204086_at          | PRAME              | 1.7E-02        | -2.78              |
| 33323_r_at         | SFN                | 1.9E-03        | -2.80              |
| 220196_at          | MUC16              | 2.7E-02        | -2.87              |
| 202581_at          | HSPA1A             | 8.1E-03        | -2.98              |
| 205350_at          | CRABP1             | 1.1E-02        | -3.00              |
| 200606_at          | DSP                | 9.1E-03        | -3.14              |
| 208651_x_at        | CD24               | 2.0E-02        | -3.17              |
| 209771_x_at        | CD24               | 2.1E-02        | -3.69              |
| 266_s_at           | CD24               | 2.2E-02        | -3.72              |
| 204885_s_at        | MSLN               | 3.0E-02        | -3.79              |
| 201131_s_at        | CDH1               | 8.9E-03        | -3.88              |
| 215729_s_at        | VGLL1              | 2.6E-03        | -4.09              |
| 216379_x_at        | CD24               | 1.5E-02        | -4.14              |
| 208650_s_at        | CD24               | 2.3E-02        | -4.26              |
| 205916_at          | S100A7             | 1.8E-02        | -4.33              |
| 201650_at          | KRT19              | 6.4E-03        | -6.03              |
