# Supplementary material for: Stat3 Mediates Expression of Autotaxin in Breast Cancer
Source: PubMed Central journal article supplement (PMC3225372; doi:10.1371/journal.pone.0027851), 2011-11-28
Supplement: pone.0027851.s004.pdf [file pone.0027851.s004.pdf]

**Supplemental Table 3**

| <b>Probeset ID</b> | <b>Gene Symbol</b> | <b>p-value</b> | <b>Fold-Change</b> | <b>Gene Symbol</b> | <b>p-value</b> | <b>Fold-Change</b> |
|--------------------|--------------------|----------------|--------------------|--------------------|----------------|--------------------|
| 218002_s_at        | CXCL14             | 4.7E-03        | 2.33               | CXCL14             | 8.5E-03        | 3.73               |
| 209392_at          | ENPP2              | 1.3E-06        | 2.14               | ENPP2              | 4.2E-07        | 8.70               |
| 210839_s_at        | ENPP2              | 4.3E-07        | 2.03               | ENPP2              | 2.0E-07        | 8.15               |
| 204472_at          | GEM                | 1.0E-06        | 1.99               | GEM                | 3.4E-03        | 2.37               |
| 209541_at          | IGF1               | 7.7E-06        | 1.95               | IGF1               | 7.3E-03        | 2.91               |
| 212192_at          | KCTD12             | 2.7E-06        | 1.90               | KCTD12             | 6.6E-04        | 3.14               |
| 212865_s_at        | COL14A1            | 1.7E-05        | 1.84               | COL14A1            | 2.5E-02        | 2.36               |
| 202746_at          | ITM2A              | 1.6E-05        | 1.83               | ITM2A              | 1.3E-02        | 2.54               |
| 206488_s_at        | CD36               | 2.6E-04        | 1.81               | CD36               | 2.3E-03        | 4.01               |
| 208892_s_at        | DUSP6              | 1.4E-04        | 1.80               | DUSP6              | 2.1E-02        | 2.47               |
| 213258_at          | TFPI               | 1.6E-06        | 1.76               | TFPI               | 1.2E-04        | 2.57               |
| 208891_at          | DUSP6              | 3.3E-04        | 1.73               | DUSP6              | 3.7E-02        | 2.17               |
| 217889_s_at        | CYBRD1             | 7.8E-04        | 1.72               | CYBRD1             | 3.9E-03        | 2.09               |
| 209612_s_at        | ADH1B              | 1.6E-03        | 1.72               | ADH1B              | 3.0E-02        | 2.83               |
| 201645_at          | TNC                | 1.2E-03        | 1.72               | TNC                | 1.8E-02        | 2.81               |
| 211896_s_at        | DCN                | 2.3E-03        | 1.66               | DCN                | 2.9E-02        | 2.44               |
| 208893_s_at        | DUSP6              | 3.0E-05        | 1.65               | DUSP6              | 1.3E-02        | 2.09               |
| 218656_s_at        | LHFP               | 2.5E-06        | 1.64               | LHFP               | 8.5E-04        | 2.30               |
| 204646_at          | DPYD               | 9.8E-07        | 1.61               | DPYD               | 1.5E-03        | 2.26               |
| 208944_at          | TGFBR2             | 7.7E-06        | 1.60               | TGFBR2             | 1.3E-04        | 2.66               |
| 202016_at          | MEST               | 3.1E-03        | 1.60               | MEST               | 9.7E-03        | 2.59               |
| 205542_at          | STEAP1             | 2.0E-03        | 1.59               | STEAP1             | 1.8E-02        | 2.40               |
| 205624_at          | CPA3               | 3.4E-04        | 1.59               | CPA3               | 6.4E-03        | 2.35               |
| 210946_at          | PPAP2A             | 2.0E-07        | 1.59               | PPAP2A             | 4.9E-03        | 2.18               |
| 209147_s_at        | PPAP2A             | 6.5E-07        | 1.59               | PPAP2A             | 4.8E-03        | 2.15               |
| 207808_s_at        | PROS1              | 3.3E-05        | 1.58               | PROS1              | 1.5E-03        | 2.53               |
| 200762_at          | DPYSL2             | 6.2E-05        | 1.58               | DPYSL2             | 6.0E-03        | 2.08               |
| 209613_s_at        | ADH1B              | 1.7E-03        | 1.58               | ADH1B              | 3.2E-02        | 2.53               |
| 203131_at          | PDGFRA             | 1.5E-03        | 1.58               | PDGFRA             | 6.1E-03        | 2.50               |
| 209555_s_at        | CD36               | 8.0E-03        | 1.57               | CD36               | 1.6E-02        | 2.97               |
| 206584_at          | LY96               | 7.0E-04        | 1.57               | LY96               | 3.3E-03        | 2.82               |
| 208131_s_at        | PTGIS              | 3.0E-04        | 1.56               | PTGIS              | 4.1E-03        | 2.61               |
| 222108_at          | AMIGO2             | 3.7E-02        | 1.55               | AMIGO2             | 1.6E-02        | 2.16               |
| 209047_at          | AQP1               | 1.5E-04        | 1.54               | AQP1               | 9.7E-04        | 2.24               |
| 204438_at          | MRC1               | 4.8E-03        | 1.53               | MRC1               | 6.4E-03        | 3.54               |
| 212298_at          | NRP1               | 1.2E-05        | 1.53               | NRP1               | 4.5E-05        | 2.51               |
| 201540_at          | FHL1               | 2.6E-04        | 1.53               | FHL1               | 6.0E-03        | 2.27               |
| 215388_s_at        | CFH                | 7.7E-06        | 1.51               | CFH                | 3.0E-04        | 2.53               |
| 201117_s_at        | CPE                | 5.0E-04        | 1.51               | CPE                | 4.4E-04        | 2.61               |
| 201581_at          | TMX4               | 7.1E-06        | 1.50               | TMX4               | 1.0E-03        | 2.02               |
| 202113_s_at        | SNX2               | 5.9E-05        | 1.50               | SNX2               | 3.9E-03        | 2.24               |
| 214290_s_at        | HIST2H2AA3         | 2.5E-02        | -1.50              | HIST2H2AA3         | 2.9E-02        | -2.00              |
| 202870_s_at        | CDC20              | 1.6E-03        | -1.54              | CDC20              | 3.9E-03        | -2.02              |
| 215729_s_at        | VGLL1              | 3.2E-02        | -1.56              | VGLL1              | 2.6E-03        | -4.09              |
| 214469_at          | HIST1H2AE          | 6.8E-04        | -1.60              | HIST1H2AE          | 9.8E-03        | -2.34              |
| 204654_s_at        | TFAP2A             | 2.6E-04        | -1.61              | TFAP2A             | 1.8E-02        | -2.04              |
| 213906_at          | MYBL1              | 1.1E-02        | -1.66              | MYBL1              | 4.1E-02        | -2.42              |
| 205350_at          | CRABP1             | 8.1E-03        | -1.79              | CRABP1             | 1.1E-02        | -3.00              |
| 204885_s_at        | MSLN               | 1.3E-03        | -1.83              | MSLN               | 3.0E-02        | -3.79              |
| 201131_s_at        | CDH1               | 5.3E-04        | -2.16              | CDH1               | 8.9E-03        | -3.88              |
